# Supplementary material
Source: PubMed Central journal article supplement (PMC4253495)

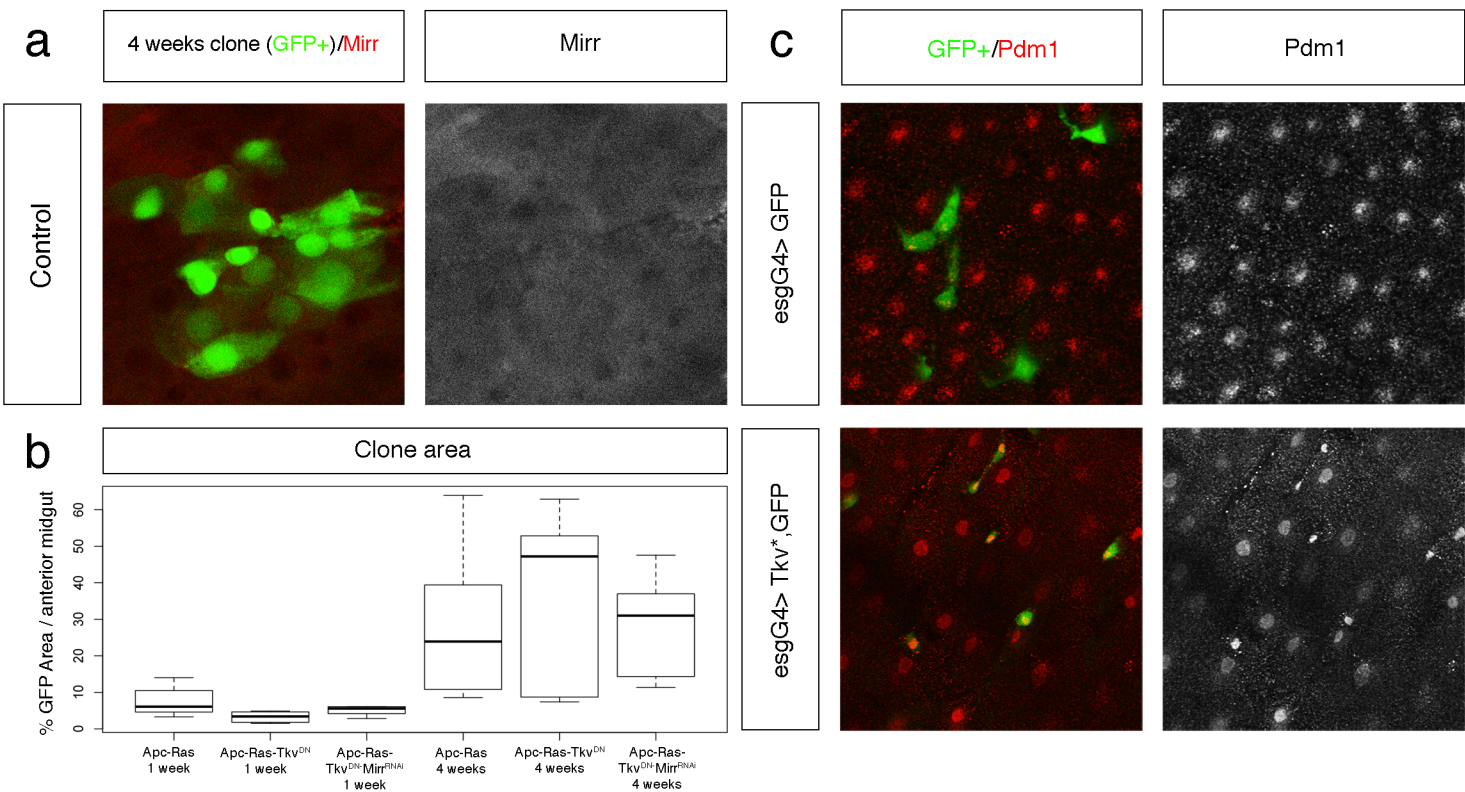

Supplementary Figure 1 Martorell et al

Supplement: embr0015-1210-sd1.pdf [file embr0015-1210-sd1.pdf]

A

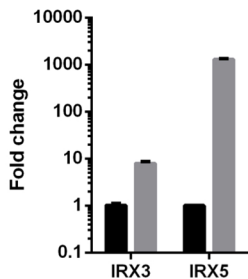

■ Normal Mucosa    ■ Adenoma

B

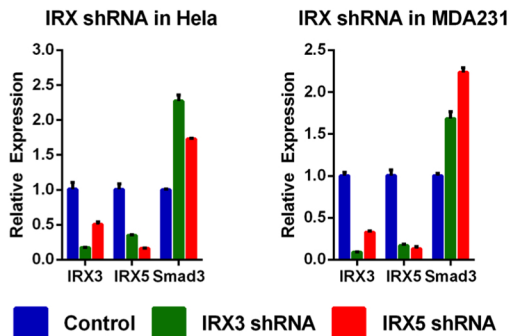

C

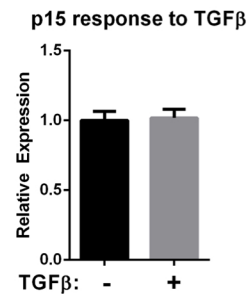

D

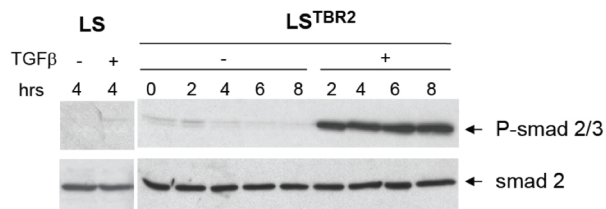

E

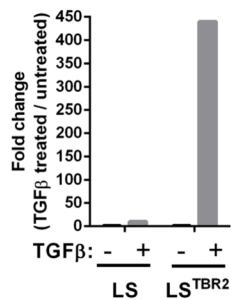

F

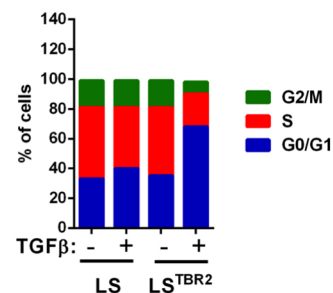

Supplementary Figure 2 Martorell et al

Supplement: embr0015-1210-sd2.pdf [file embr0015-1210-sd2.pdf]

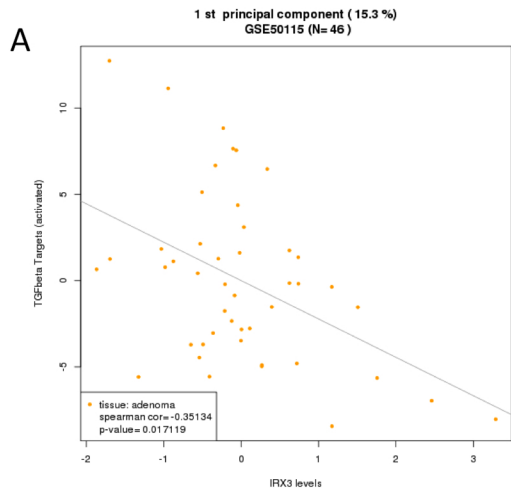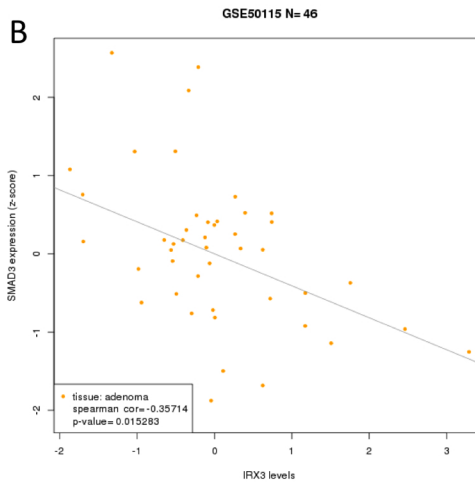

Supplementary Figure 3 Martorell et al

Supplement: embr0015-1210-sd3.pdf [file embr0015-1210-sd3.pdf]

smad2

Dox  
TGFβ

+ -  
- +  
TR4

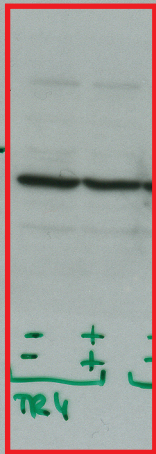

- + - +  
- + - +  
TR4 19

+ -  
- +  
19

Ⓟ smad2

Dox  
TGFβ

+ -  
- +  
TR4

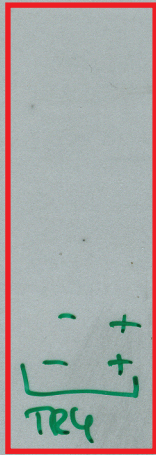

- + - +  
- + - +  
TR4 19

+ -  
- +  
19

TβRII

- TGFβ - Dox      + TGFβ + Dox  
0 2 4 6 8      2 4 6 8 hrs

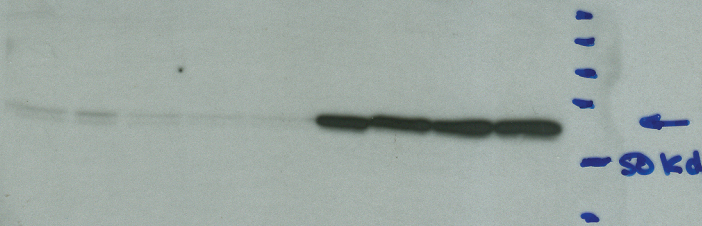

← Ⓟ smad2

- 50kd

smad2

0 2\* 4 6 8      2 4 6 8  
- Dox - TGFβ      + Dox + TGFβ

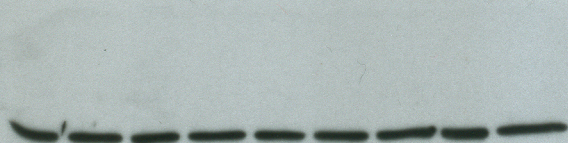

Supplement: embr0015-1210-sd8.pdf [file embr0015-1210-sd8.pdf]
